# Supplementary material for: The BET inhibitor apabetalone decreases neuroendothelial proinflammatory activationin vitroand in a mouse model of systemic inflammation
Source: publisher site journal article supplement (doi:10.1515/tnsci-2022-0332), 2023-01-01
Supplement: Supplementary file [file Wasiak_et_al_Supplementary_Tables.pdf]

Wasiak et al. Table S1 (Supporting Figure 1)

Cytokine-induced gene expression in hCMEC/D3 cells is reduced by BET protein inhibition after 24h of treatment.

| Target Name |               | TNF $\alpha$ + IFN $\gamma$ | TNF $\alpha$ + IFN $\gamma$ + Apabetalone |          |
|-------------|---------------|-----------------------------|-------------------------------------------|----------|
| Protein     | Gene          | Fold Induction*             | % Inhibition†                             | p-value‡ |
| MCP-3       | <i>CCL7</i>   | 149                         | 96                                        | <0.0001  |
| Fractalkine | <i>CX3CL1</i> | 964                         | 89                                        | <0.0001  |
| MCP-1       | <i>CCL2</i>   | 15                          | 66                                        | <0.0001  |
| RANTES      | <i>CCL5</i>   | 593                         | 83                                        | <0.0001  |
| IL-6        | <i>IL6</i>    | 66                          | 81                                        | <0.0001  |
| IL-8        | <i>CXCL8</i>  | 32                          | 60                                        | <0.0001  |
| IP-10       | <i>CXCL10</i> | 14073                       | 58                                        | <0.0001  |
| GM-CSF      | <i>CSF2</i>   | 17                          | 89                                        | <0.0001  |

\*mRNA fold induction in response to 24h cytokine treatment (100ng/mL) was calculated relative to cytokine-naïve cells treated with vehicle for the same amount of time (0.05% DMSO).

†Gene expression inhibition was calculated relative to the induced state in cells co-treated with cytokines and 25 $\mu$ M apabetalone.

‡Statistical significance was calculated with one-way ANOVA with Dunnett's correction. ns, non-significant, ns: non-significant, n=3.

Wasiak et al. Table S2 (Supporting Table 3)

Pharmacokinetic distribution of apabetalone in mouse plasma and brain tissue.

| Tissue*               | Mean Concentration ( $\mu\text{M}$ ) |
|-----------------------|--------------------------------------|
|                       | Apabetalone                          |
| Brain                 | 2.4                                  |
| Plasma                | 32                                   |
| Brain to Plasma Ratio | 0.07                                 |

\*Plasma and saline-perfused brains were collected from naïve mice at 3h post single oral dose of 150mg/kg apabetalone, n=3.
